# Supplementary material for: What Dietary Vitamins and Minerals Might Be Protective against Parkinson’s Disease?
Source: MDPI journal article supplement (doi:10.3390/brainsci13071119), 2023-07-24
Supplement: s1 [file s1]

Supplementary Table S1. Comparison of dietary intake of vitamins between females and males

|                       | Total             |                   |                   | Parkinson's disease |                   |                   | Healthy individuals |                   |                          |
|-----------------------|-------------------|-------------------|-------------------|---------------------|-------------------|-------------------|---------------------|-------------------|--------------------------|
|                       | Female (n=58)     | Male (n=112)      | p                 | Female (n=41)       | Male (n=79)       | p                 | Female (n=17)       | Male (n=33)       | p                        |
| Vitamin A (mg)        | 453.02 ± 196.53   | 395.59 ± 149.97   | <b>0.05</b>       | 448.58 ± 203.09     | 412.75 ± 156.60   | 0.33              | 463.71 ± 185.23     | 354.51 ± 125.61   | <b>0.04</b>              |
| β-Carotene (mg)       | 2766.05 ± 1339.90 | 1339.90 ± 1096.18 | <b>0.03</b>       | 2764.93 ± 1401.06   | 2394.62 ± 1163.16 | 0.17 <sup>†</sup> | 2768.76 ± 1220.02   | 2111.40 ± 901.08  | <b>0.04</b>              |
| α-Carotene (mg)       | 398.17 ± 307.50   | 320.27 ± 263.83   | 0.09 <sup>†</sup> | 413.16 ± 321.04     | 332.44 ± 256.38   | 0.18 <sup>†</sup> | 362.01 ± 277.89     | 291.14 ± 282.81   | 0.33 <sup>†</sup>        |
| Lutein (mg)           | 1323.34 ± 719.40  | 1173.12 ± 503.98  | 0.23 <sup>†</sup> | 1334.64 ± 778.18    | 1159.78 ± 525.91  | 0.31 <sup>†</sup> | 1296.10 ± 573.35    | 1205.05 ± 453.20  | 0.54                     |
| β-Cryptoxanthin (mg)  | 155.65 ± 87.51    | 140.15 ± 89.24    | 0.19 <sup>†</sup> | 157.31 ± 94.32      | 151.88 ± 95.38    | 0.76 <sup>†</sup> | 151.66 ± 70.82      | 112.07 ± 65.57    | <b>0.048<sup>†</sup></b> |
| Lycopene (mg)         | 4430.81 ± 1624.67 | 4237.74 ± 1797.76 | 0.49              | 4277.08 ± 1655.99   | 4028.16 ± 1800.67 | 0.46              | 4801.59 ± 1530.02   | 4739.47 ± 1714.46 | 0.90                     |
| Vitamin C (mg)        | 98.32 ± 47.51     | 83.92 ± 36.78     | <b>0.047</b>      | 96.79 ± 46.11       | 89.71 ± 39.54     | 0.38              | 102.01 ± 51.99      | 70.05 ± 24.54     | <b>0.03<sup>†</sup></b>  |
| Vitamin D (µg)        | 1.19 ± 0.85       | 1.18 ± 0.89       | 0.98 <sup>†</sup> | 1.18 ± 0.87         | 1.17 ± 0.81       | 0.82 <sup>†</sup> | 1.22 ± .84          | 1.21 ± 1.08       | 0.67 <sup>†</sup>        |
| Vitamin E (mg)        | 11.53 ± 3.93      | 11.41 ± 2.64      | 0.83              | 11.99 ± 4.00        | 11.40 ± 2.73      | 0.34              | 10.41 ± 3.64        | 11.43 ± 2.46      | 0.24                     |
| α-Tocopherol (mg)     | 7.34 ± 2.57       | 6.91 ± 1.70       | 0.25              | 7.67 ± 2.59         | 7.04 ± 1.78       | 0.12              | 6.56 ± 2.43         | 6.61 ± 1.48       | 0.94                     |
| Thiamin (mg)          | 1.56 ± 0.44       | 1.87 ± 0.45       | <b>&lt;0.001</b>  | 1.51 ± 0.46         | 1.82 ± 0.47       | <b>0.001</b>      | 1.68 ± 0.36         | 2.00 ± 0.36       | <b>0.004</b>             |
| Riboflavin (mg)       | 1.62 ± 0.62       | 1.63 ± 0.45       | 0.92              | 1.53 ± 0.61         | 1.61 ± 0.47       | 0.42              | 1.83 ± 0.60         | 1.67 ± 0.41       | 0.33                     |
| Niacin (mg)           | 17.14 ± 4.39      | 20.70 ± 5.09      | <b>&lt;0.001</b>  | 17.14 ± 4.75        | 20.48 ± 5.37      | <b>0.001</b>      | 17.14 ± 3.50        | 21.24 ± 4.35      | <b>0.002</b>             |
| Vitamin B6 (mg)       | 1.52 ± 0.43       | 1.61 ± 0.38       | 0.13              | 1.45 ± 0.42         | 1.58 ± 0.39       | 0.10              | 1.68 ± 0.42         | 1.70 ± 0.32       | 0.86                     |
| Folate (mg)           | 392.63 ± 93.76    | 456.46 ± 103.50   | <b>&lt;0.001</b>  | 390.57 ± 96.92      | 443.59 ± 108.44   | <b>0.01</b>       | 397.58 ± 88.30      | 487.29 ± 84.29    | <b>0.001</b>             |
| Vitamin B12 (mg)      | 3.12 ± 1.60       | 3.22 ± 1.56       | 0.56 <sup>†</sup> | 2.95 ± 1.62         | 3.12 ± 1.65       | 0.44 <sup>†</sup> | 3.52 ± 1.51         | 3.44 ± 1.32       | 0.85                     |
| Biotin                | 27.25 ± 9.91      | 30.16 ± 8.86      | <b>0.05</b>       | 25.86 ± 9.91        | 29.55 ± 9.18      | <b>0.04</b>       | 30.60 ± 9.37        | 31.61 ± 8.00      | 0.69                     |
| Pantothenic acid (mg) | 4.50 ± 1.40       | 4.86 ± 1.24       | 0.09              | 4.27 ± 1.35         | 4.70 ± 1.26       | 0.08              | 5.06 ± 1.41         | 5.24 ± 1.15       | 0.64                     |
| Vitamin K (Mg)        | 150.41 ± 83.23    | 129.33 ± 76.49    | 0.11 <sup>†</sup> | 150.06 ± 84.27      | 129.10 ± 86.58    | 0.15 <sup>†</sup> | 151.26 ± 83.20      | 129.88 ± 44.94    | 0.48 <sup>†</sup>        |

Data presented as mean ± SD. <sup>†</sup> Mann-Whitney test was used for analysis.
