# Supplementary material for: What Dietary Vitamins and Minerals Might Be Protective against Parkinson’s Disease?
Source: MDPI journal article supplement (doi:10.3390/brainsci13071119), 2023-07-24
Supplement: s1 [file s1]

Supplementary Table S2. Comparison of dietary intake of minerals between females and males

|                 | Total             |                   |                              | Parkinson's disease |                   |                          | Healthy individuals |                   |                          |
|-----------------|-------------------|-------------------|------------------------------|---------------------|-------------------|--------------------------|---------------------|-------------------|--------------------------|
|                 | Female (n=58)     | Male (n=112)      | p                            | Female (n=41)       | Male (n=79)       | p                        | Female (n=17)       | Male (n=33)       | p                        |
| Calcium (mg)    | 867.36 ± 426.71   | 795.44 ± 299.49   | 0.25                         | 794.35 ± 411.60     | 790.20 ± 322.01   | 0.79 <sup>†</sup>        | 1043.43 ± 422.54    | 807.96 ± 241.15   | <b>0.04</b>              |
| Iron (mg)       | 12.91 ± 3.45      | 15.55 ± 3.59      | <b>&lt;0.001</b>             | 12.86 ± 3.57        | 15.23 ± 3.74      | <b>0.001</b>             | 13.02 ± 3.25        | 16.32 ± 3.14      | <b>0.001</b>             |
| Phosphorus (mg) | 1231.83 ± 440.52  | 1326.57 ± 361.53  | 0.16                         | 1151.84 ± 426.89    | 1298.84 ± 382.28  | 0.06                     | 1424.75 ± 424.01    | 1392.96 ± 301.19  | 0.78                     |
| Magnesium (mg)  | 341.51 ± 108.97   | 388.52 ± 97.63    | <b>0.005</b>                 | 325.78 ± 107.41     | 378.79 ± 102.78   | <b>0.009</b>             | 379.44 ± 106.28     | 411.81 ± 80.78    | 0.23                     |
| Zinc (mg)       | 9.64 ± 3.16       | 10.86 ± 2.94      | <b>0.01</b>                  | 9.11 ± 2.94         | 10.60 ± 3.14      | <b>0.01</b>              | 10.92 ± 3.39        | 11.49 ± 2.35      | 0.49                     |
| Copper (mg)     | 1.33 ± 0.38       | 1.56 ± 0.36       | <b>&lt;0.001</b>             | 1.32 ± 0.37         | 1.52 ± 0.38       | <b>0.005</b>             | 1.37 ± 0.41         | 1.64 ± 0.31       | <b>0.01</b>              |
| Manganese (mg)  | 5.89 ± 2.01       | 8.08 ± 2.53       | <b>&lt;0.001</b>             | 5.76 ± 2.27         | 7.60 ± 2.64       | <b>&lt;0.001</b>         | 6.18 ± 1.18         | 9.22 ± 1.82       | <b>&lt;0.001</b>         |
| Selenium (mg)   | 97.33 ± 31.59     | 129.46 ± 38.69    | <b>&lt;0.001</b>             | 95.11 ± 35.43       | 123.82 ± 40.25    | <b>&lt;0.001</b>         | 102.71 ± 19.29      | 142.96 ± 31.26    | <b>&lt;0.001</b>         |
| Fluorine        | 1954.92 ± 1056.22 | 2592.05 ± 1441.96 | <b>0.01<sup>†</sup></b>      | 2064.23 ± 1109.95   | 2392.31 ± 1460.78 | 0.37 <sup>†</sup>        | 1691.29 ± 888.78    | 3070.22 ± 1294.91 | <b>0.001<sup>†</sup></b> |
| Chromium        | 0.13 ± 0.08       | 0.20 ± 0.11       | <b>&lt;0.001<sup>†</sup></b> | 0.12 ± 0.10         | 0.19 ± 0.12       | <b>0.002<sup>†</sup></b> | 0.15 ± 0.04         | 0.23 ± 0.07       | <b>&lt;0.001</b>         |
| Potassium (mg)  | 2851.70 ± 981.50  | 2785.25 ± 719.49  | 0.62                         | 2734.15 ± 939.61    | 2765.64 ± 744.83  | 0.85                     | 3135.22 ± 1050.68   | 2832.21 ± 663.47  | 0.22                     |

Data presented as mean ± SD. <sup>†</sup> Mann-Whitney test was used for analysis.
